# Supplementary material for: Cell-Wall-Degrading Enzymes-Related Genes Originating from Rhizoctonia solani Increase Sugar Beet Root Damage in the Presence of Leuconostoc mesenteroides
Source: MDPI journal article supplement (doi:10.3390/ijms23031366), 2022-01-25
Supplement: s1 [file s1]

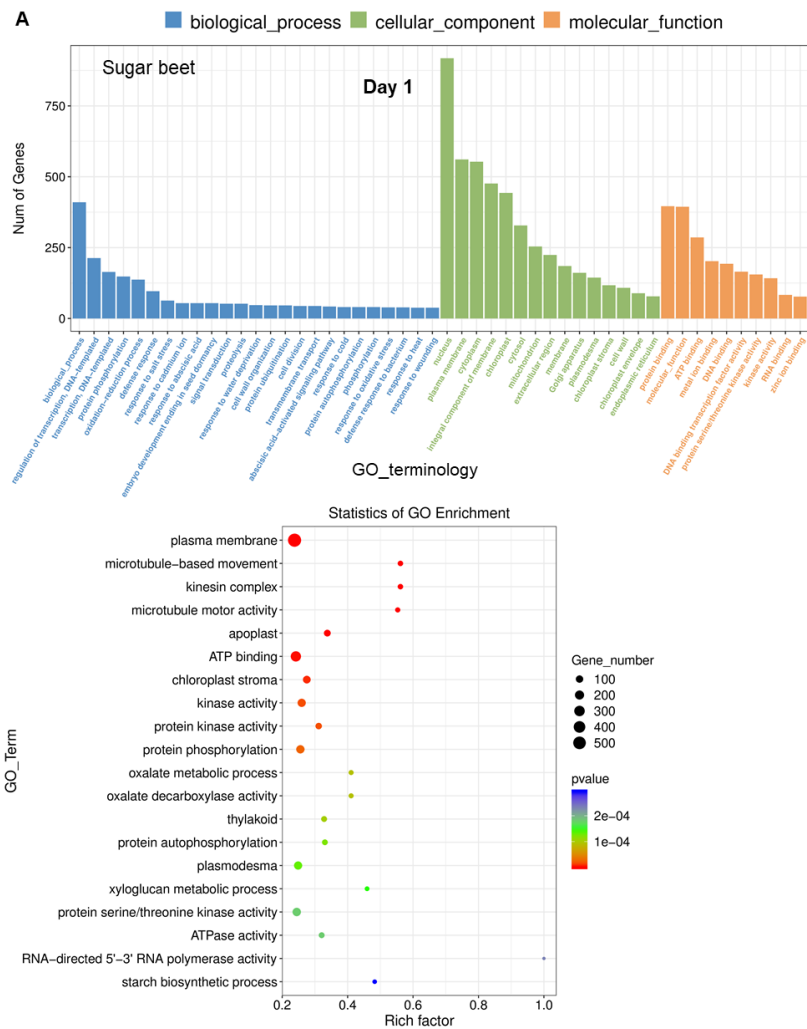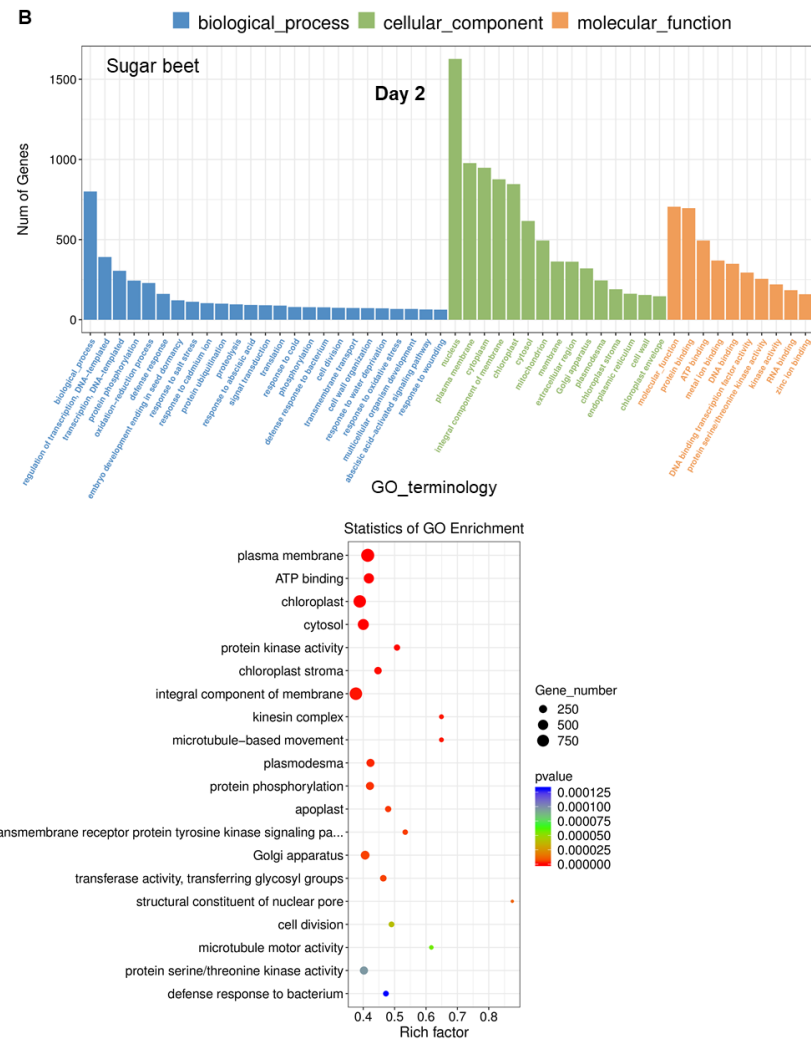

**Figure S1.** (continued)

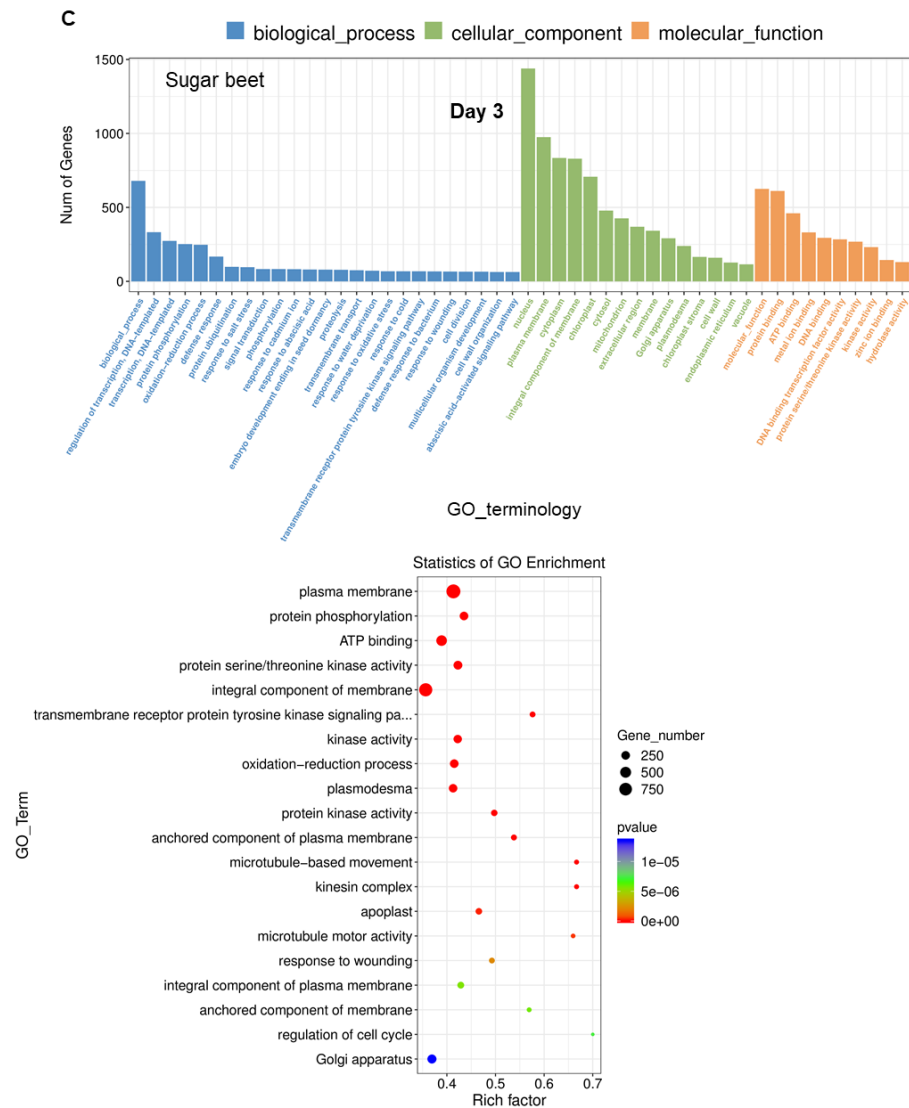

**Figure S1.** Gene ontology (GO) of differentially expressed sugar beet genes show a distinct pattern with different infection stages during interaction with *Rhizoctonia solani* and *Leuconostoc mesenteroides*. (A) 1 dpi, (B) 2 dpi, and (C) 3 dpi.

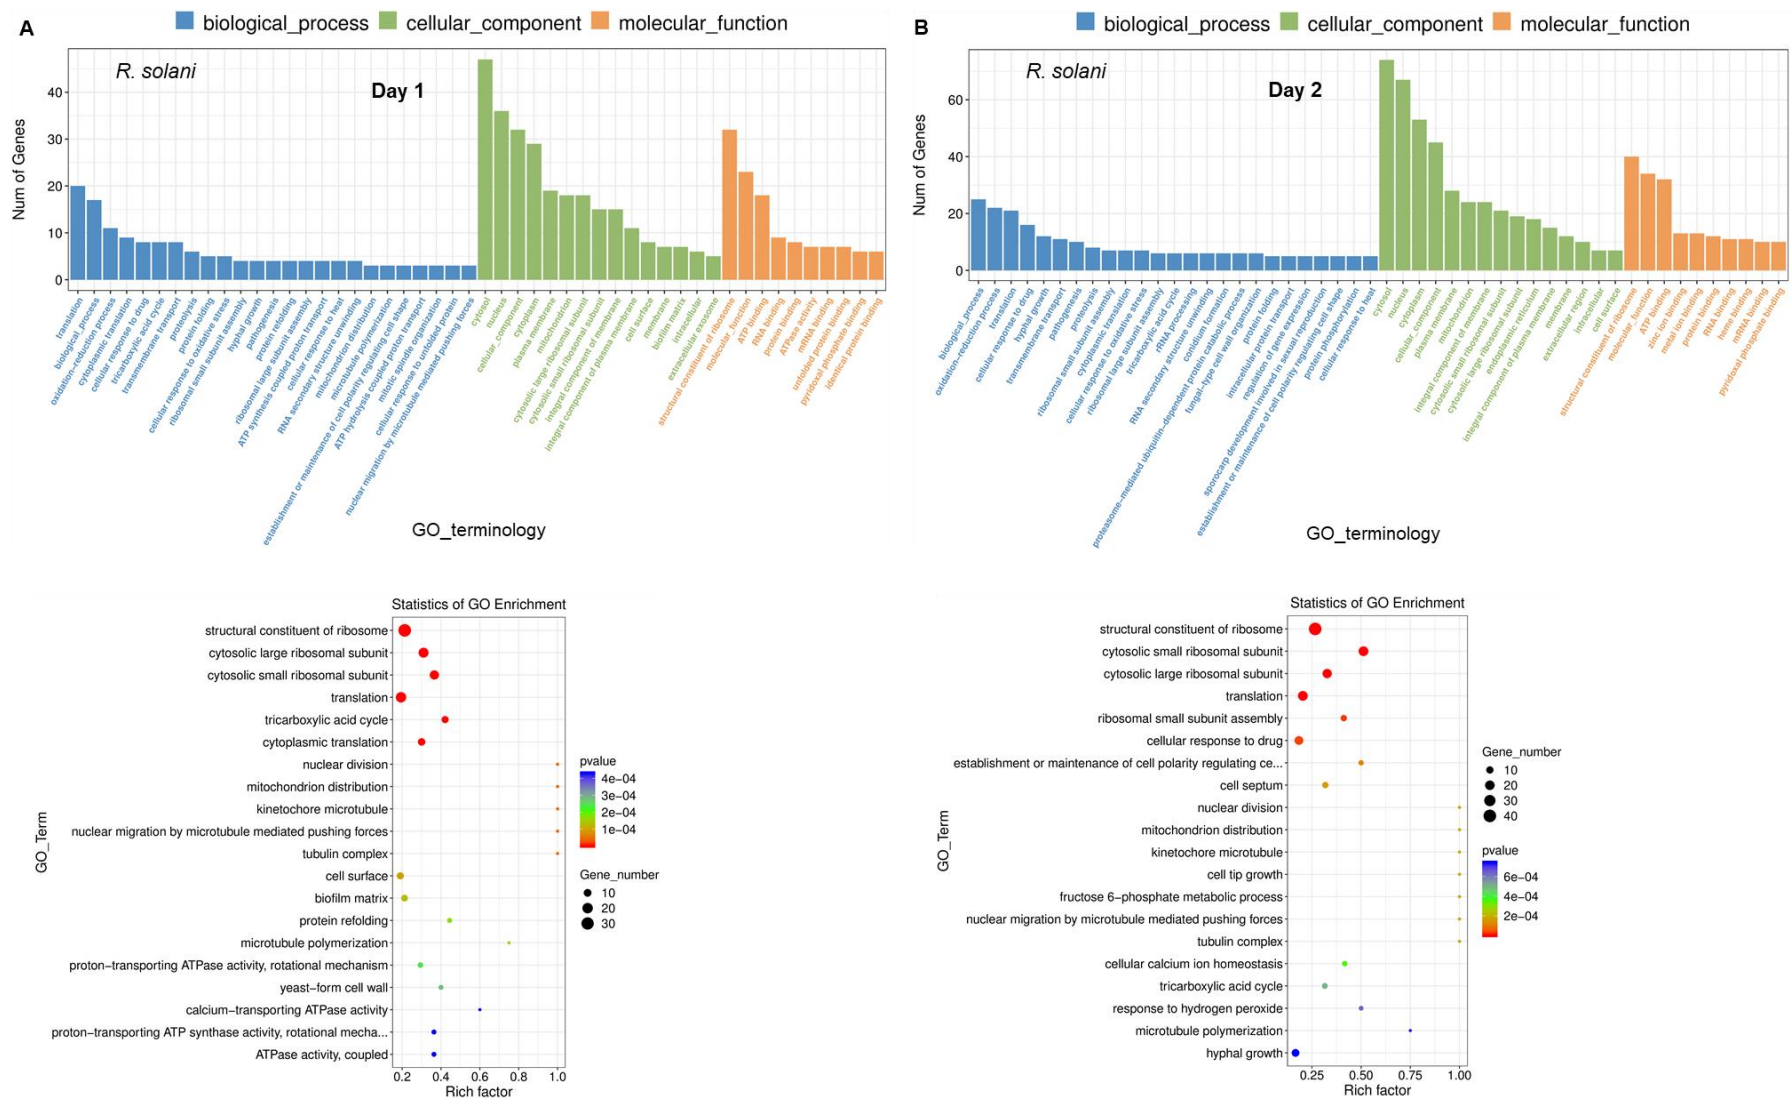

**Figure S2. (continued)**

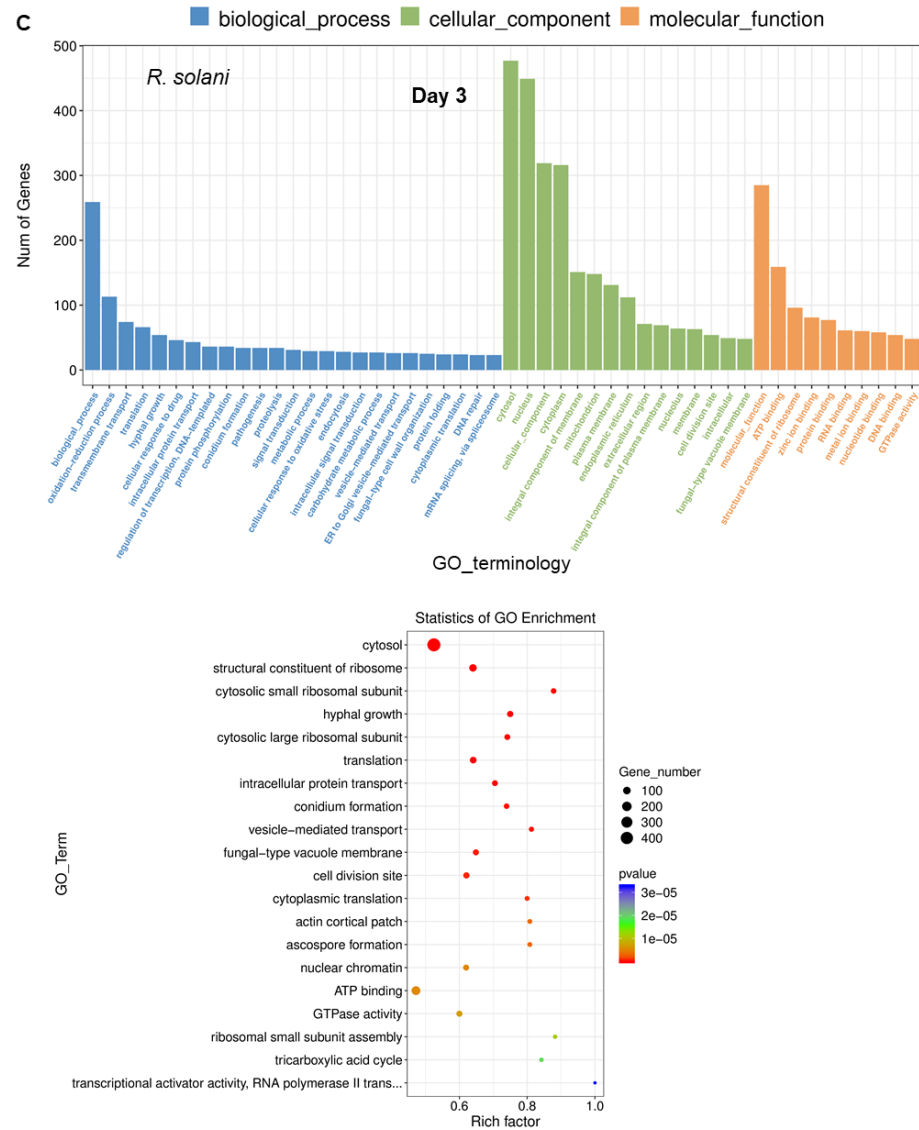

**Figure S2.** Gene ontology (GO) of differentially expressed *Rhizoctonia solani* genes show a distinct pattern with different infection stages during interaction with sugar beet and *Leuconostoc mesenteroides*. (A) 1 dpi, (B) 2 dpi, and (C) 3 dpi.

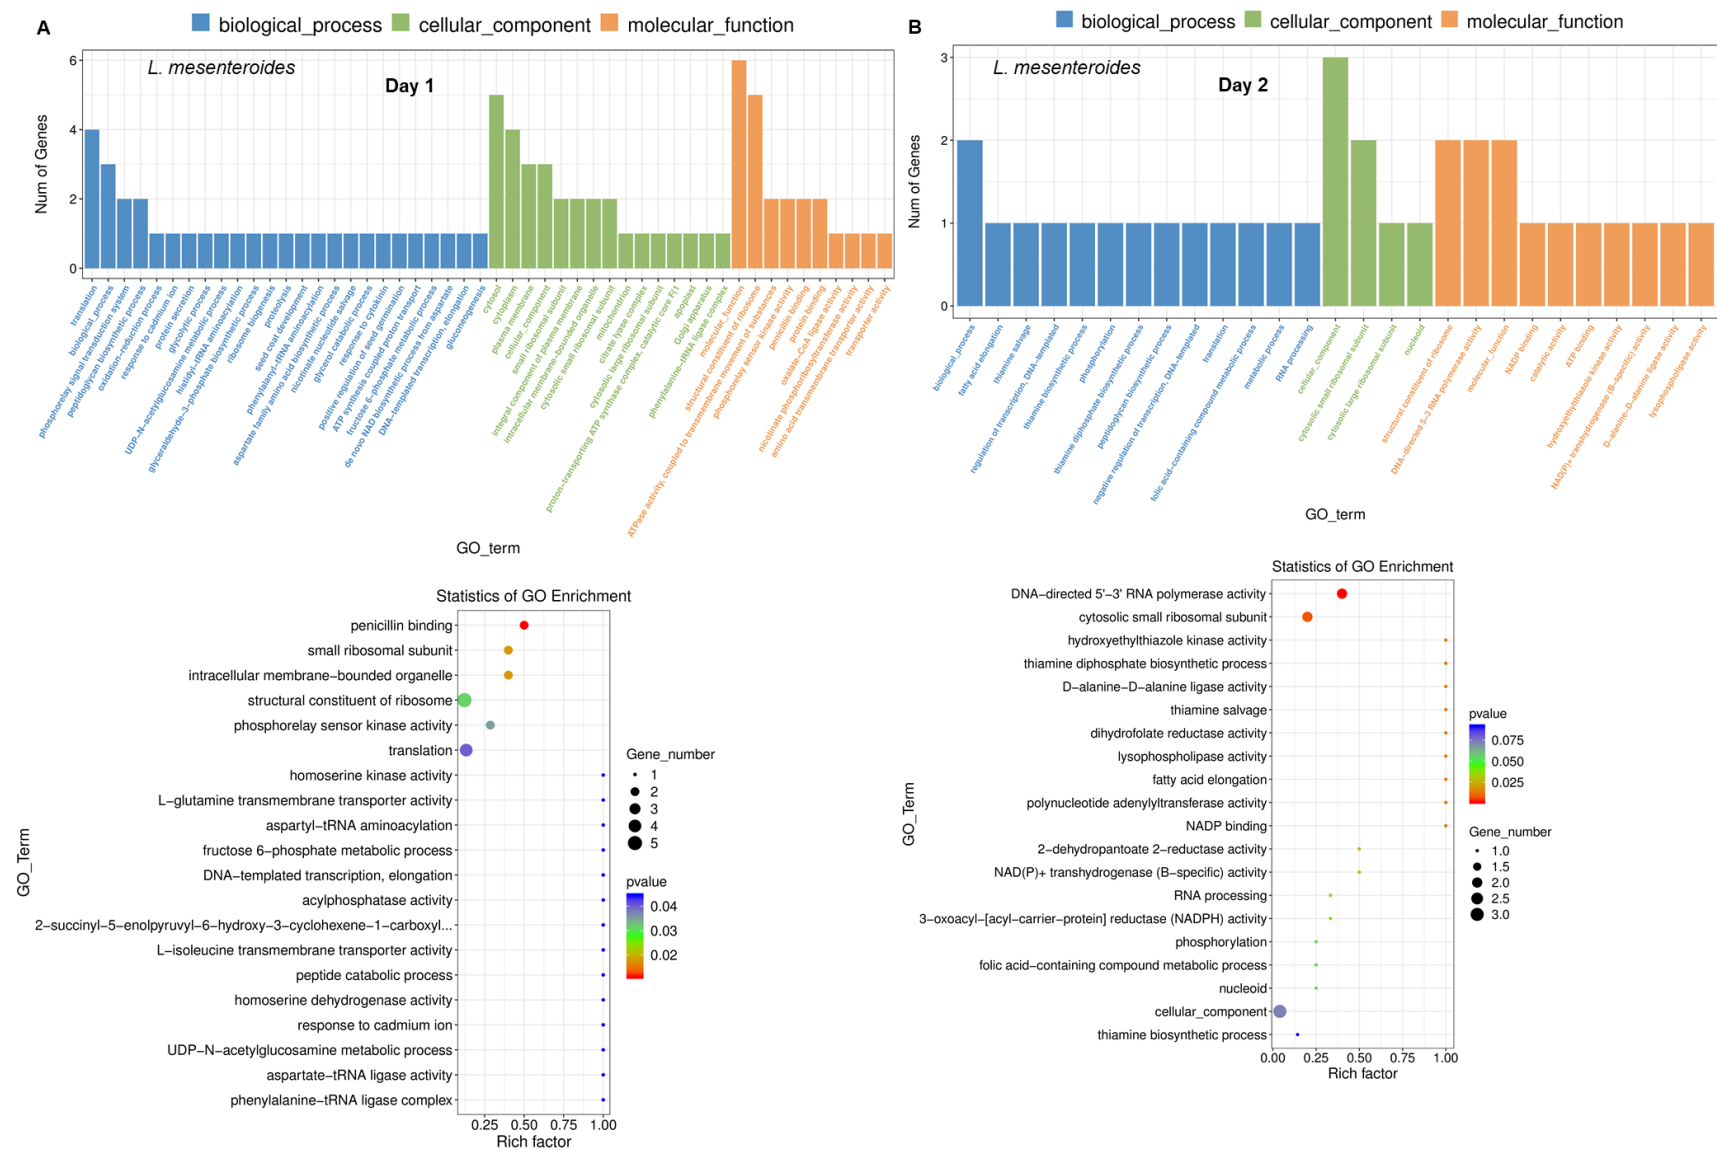

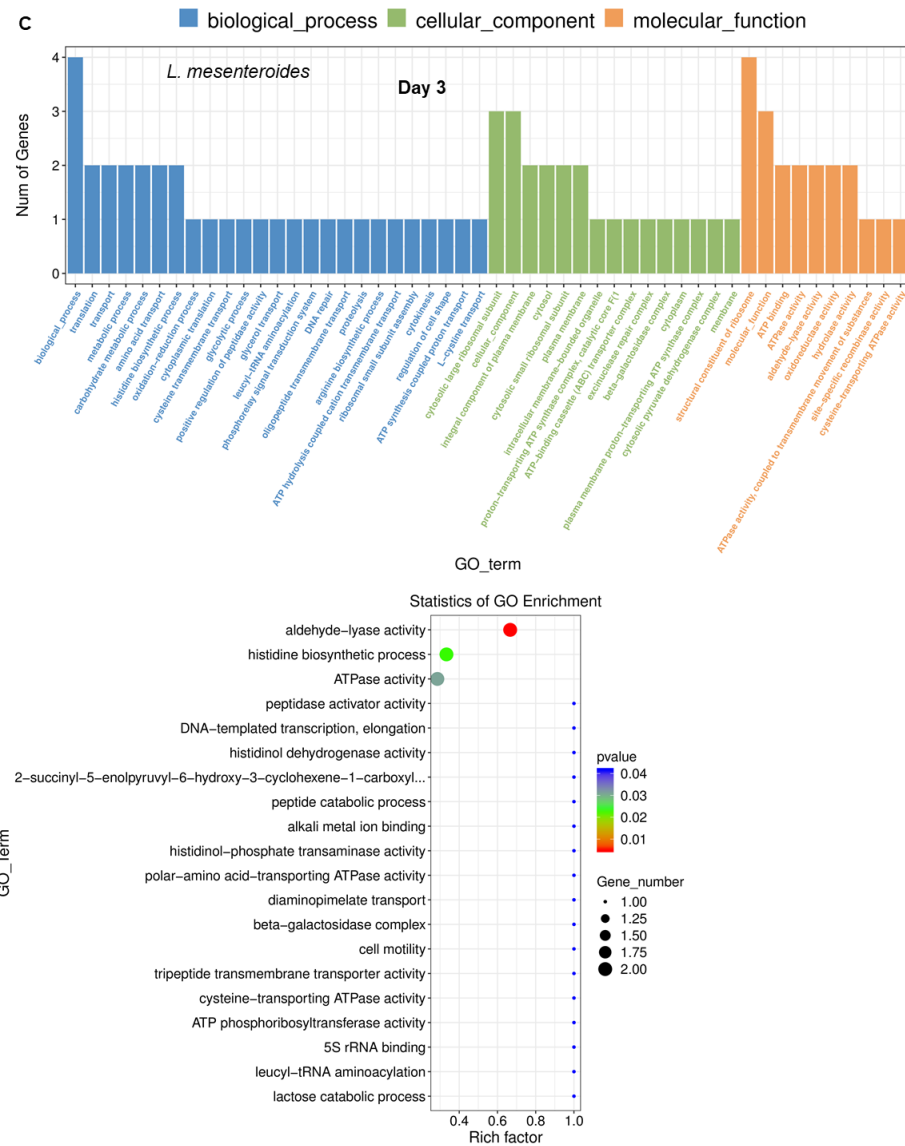

**Figure S3.** Gene ontology (GO) of differentially expressed *Leuconostoc mesenteroides* genes show a distinct pattern with different infection stages during interaction with sugar beet and *Rhizoctonia solani*. (A) 1 dpi, (B) 2 dpi, and (C) 3 dpi.

*L. mesenteroides*

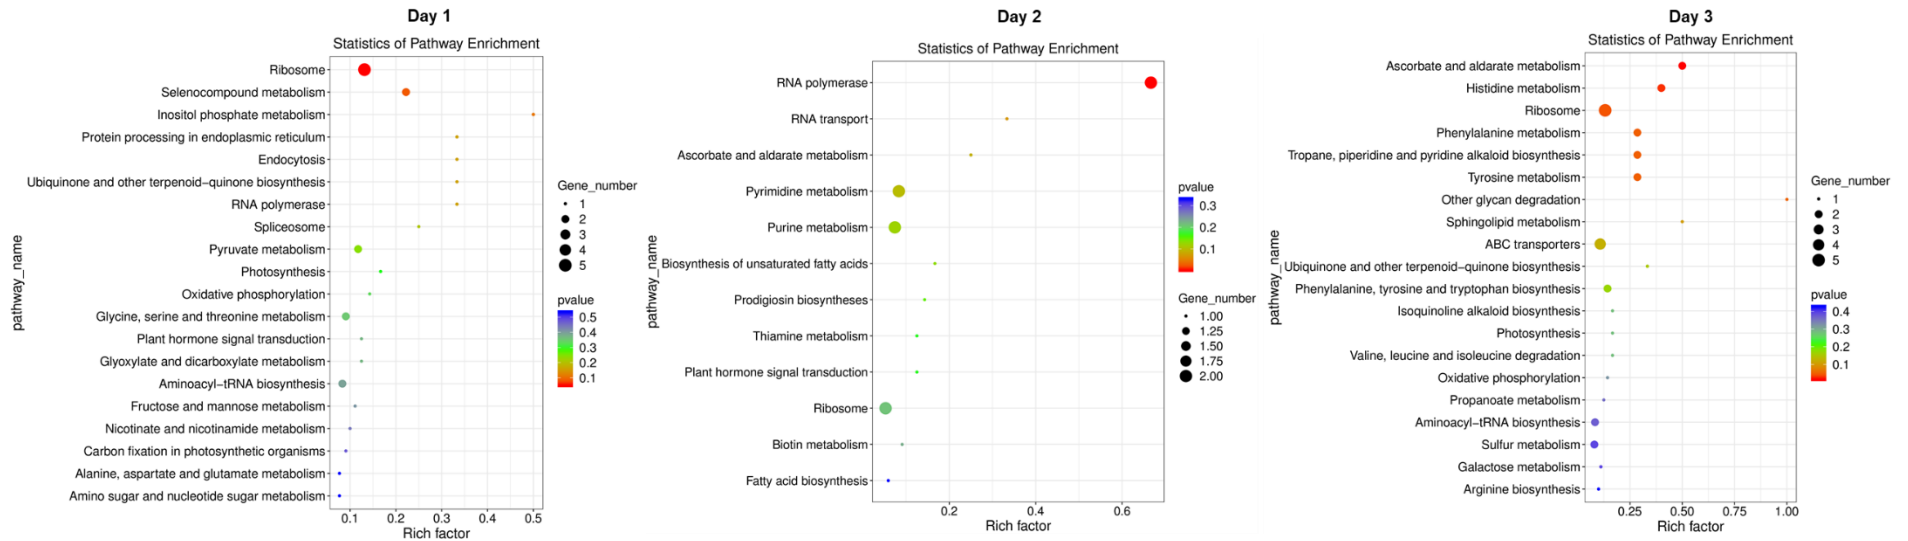

**Figure S4.** Pathway enrichment of *Leuconostoc mesenteroides* genes show differential responses with infection stages during interaction with sugar beet and *Rhizoctonia solani*. Kyoto Encyclopedia of Genes and Genomes (KEGG) enrichment of *R. solani* genes at (A) 1 dpi, (B) 2 dpi, and (C) 3 dpi. Data are mean of 4 biological replicates.



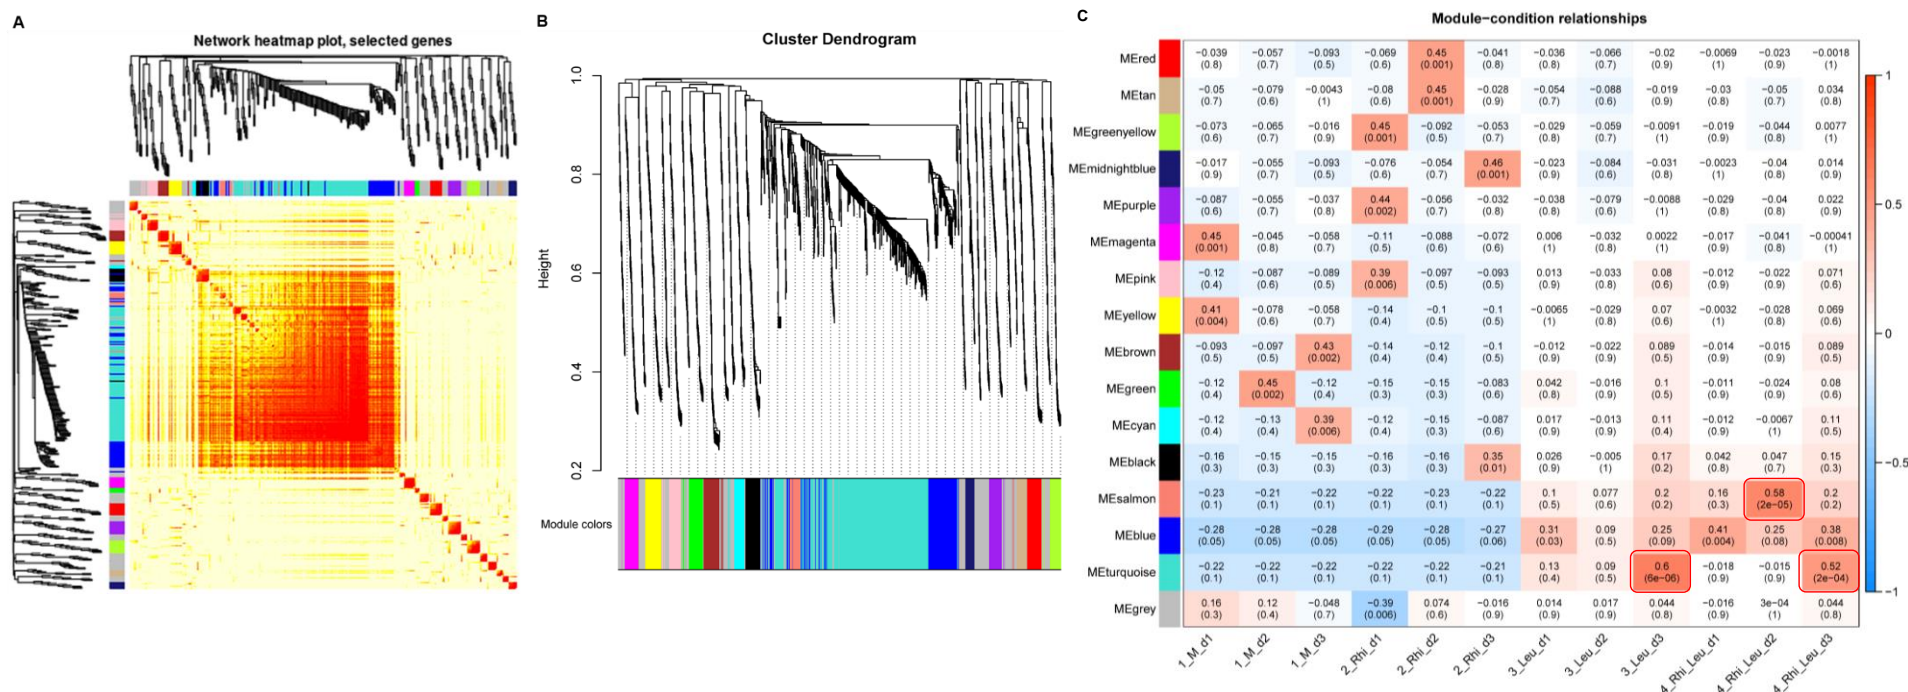

**Figure S5.** Weighted gene co-expression network analysis (WGCNA) of *Leuconostoc mesenteroides* genes during interaction with sugar beet in presence or absence of *R. solani* show distinct clustering pattern with infection stages and treatment type. (A) Heatmap showing network of differentially expressed selected genes, (B) gene cluster dendrogram, and (C) module-condition relationship. Data are Mean of 4 biological replicates. Modules with high correlation values ( $>0.5$ ) and significance ( $p < 0.05$ ) are boxed with red rectangles.



**Table S1.** Differentially expressed (mean normalized FPKM value) representative sugar beet genes with high expression in the roots at 2-day post inoculation (dpi) with *Rhizoctonia solani* (Rhi) and *Leuconostoc mesenteroides* (Leu). Data are Mean of 4 biological replicates ( $p < 0.05$ ; mock vs. treatment).

| Gene_ID       | Description                                                         | FPKM Mock | FPKM Rhi | FPKM Leu | FPKM Rhi+Leu |
|---------------|---------------------------------------------------------------------|-----------|----------|----------|--------------|
| EL10Ac8g19059 | auxin-binding protein ABP19b                                        | 1.75      | 313.32   | 4.24     | 299.88       |
| EL10Ac6g15542 | peroxidase 27                                                       | 0.93      | 306.29   | 2.28     | 503.30       |
| EL10Ac6g14807 | E3 ubiquitin-protein ligase ATL31                                   | 12.09     | 306.12   | 35.44    | 253.93       |
| EL10Ac4g09723 | 4,5-DOPA dioxygenase extradiol                                      | 4.99      | 170.08   | 27.78    | 175.31       |
| EL10Ac8g19060 | auxin-binding protein ABP19b                                        | 0.92      | 164.02   | 2.64     | 170.26       |
| EL10Ac4g09811 | uncharacterized protein                                             | 6.49      | 156.12   | 21.31    | 145.69       |
| EL10Ac8g19057 | auxin-binding protein ABP19b                                        | 1.62      | 151.66   | 1.44     | 167.91       |
| EL10Ac8g19078 | auxin-binding protein ABP19b                                        | 1.10      | 128.44   | 2.59     | 104.51       |
| EL10Ac8g19076 | auxin-binding protein ABP19b                                        | 1.70      | 95.00    | 4.34     | 96.13        |
| EL10Ac7g17522 | hypothetical protein                                                | 3.91      | 87.92    | 10.30    | 76.25        |
| EL10Ac8g20260 | Pollen proteins Ole e I                                             | 3.18      | 80.71    | 17.03    | 95.11        |
| EL10Ac4g10349 | transmembrane protein 45B                                           | 0.87      | 79.63    | 5.61     | 69.48        |
| EL10Ac2g03442 | zinc finger protein ZAT12                                           | 2.60      | 79.32    | 14.90    | 69.93        |
| EL10Ac4g09030 | probable glutathione S-transferase parC                             | 0.00      | 61.54    | 0.30     | 56.53        |
| EL10Ac5g11004 | glutathione S-transferase U9                                        | 3.20      | 52.35    | 8.82     | 52.55        |
| EL10Ac8g18508 | unknown function                                                    | 2.11      | 50.11    | 6.81     | 54.25        |
| EL10Ac9g22251 | probable indole-3-acetic acid-amido synthetase GH3.1                | 0.89      | 49.43    | 5.32     | 48.43        |
| EL10Ac9g21784 | allene oxide synthase                                               | 4.79      | 47.97    | 5.82     | 58.12        |
| EL10Ac6g14665 | hypothetical protein                                                | 0.30      | 43.59    | 0.73     | 35.95        |
| EL10Ac9g22526 | auxin-binding protein ABP19a                                        | 0.40      | 36.23    | 2.35     | 29.55        |
| EL10Ac2g02985 | vacuolar amino acid transporter 1                                   | 0.98      | 28.12    | 0.72     | 31.28        |
| EL10Ac9g22527 | auxin-binding protein ABP19b                                        | 0.86      | 25.08    | 0.57     | 27.63        |
| EL10Ac5g10581 | UDP-glycosyltransferase 74F2                                        | 0.56      | 20.58    | 3.38     | 23.78        |
| EL10Ac2g04904 | laccase-12                                                          | 0.00      | 18.50    | 14.61    | 14.64        |
| EL10Ac9g22620 | benzyl alcohol O-benzoyltransferase                                 | 0.31      | 15.14    | 2.47     | 24.50        |
| EL10Ac4g08289 | auxin-binding protein ABP19a                                        | 0.68      | 14.97    | 1.49     | 17.42        |
| EL10Ac7g16738 | auxin-binding protein ABP19a                                        | 0.10      | 14.86    | 0.46     | 18.41        |
| EL10Ac5g11314 | mitochondrial phosphate carrier protein 3, mitochondrial            | 0.00      | 14.65    | 0.98     | 3.65         |
| EL10Ac3g05264 | unknown function                                                    | 0.05      | 13.99    | 0.48     | 15.11        |
| EL10Ac1g00741 | fasciclin-like arabinogalactan protein 21                           | 0.23      | 10.44    | 0.54     | 8.32         |
| EL10Ac8g19379 | probable nucleolar protein 5-2                                      | 0.00      | 8.00     | 2.73     | 8.16         |
| EL10Ac5g11015 | gibberellin-regulated protein 6                                     | 54.85     | 6.24     | 39.32    | 1.81         |
| EL10Ac2g04142 | ethylene-responsive transcription factor ERF003                     | 30.66     | 4.41     | 25.69    | 0.00         |
| EL10Ac7g16859 | protein SRG1                                                        | 0.00      | 3.40     | 2.16     | 28.20        |
| EL10Ac6g15595 | probable leucine-rich repeat receptor-like protein kinase At1g35710 | 38.48     | 3.06     | 26.07    | 0.95         |
| EL10Ac5g11344 | mitochondrial import inner membrane translocase subunit TIM8        | 3.64      | 0.00     | 20.83    | 0.00         |
| EL10Ac8g20056 | peroxidase 42                                                       | 59.37     | 2.42     | 52.60    | 0.79         |
| EL10Ac9g22046 | aquaporin TIP2-1                                                    | 54.03     | 1.34     | 22.50    | 0.30         |
| EL10Ac4g10104 | endoglucanase 8                                                     | 8.75      | 0.72     | 4.82     | 0.11         |
| EL10Ac3g05664 | V-type proton ATPase subunit C                                      | 0.00      | 0.00     | 39.21    | 22.64        |

**Table S2.** Differentially expressed (mean normalized FPKM value) representative sugar beet genes with high expression in the roots at 3-day post inoculation (dpi) with *Rhizoctonia solani* (Rhi) and *Leuconostoc mesenteroides* (Leu). Data are Mean of 4 biological replicates ( $p < 0.05$ ; mock vs. treatment).

| Gene_ID       | Description                                          | FPKM Mock | FPKM Rhi | FPKM Leu | FPKM Rhi+Leu |
|---------------|------------------------------------------------------|-----------|----------|----------|--------------|
| EL10Ac7g15862 | peroxidase 4                                         | 14.12     | 885.32   | 253.33   | 813.73       |
| EL10Ac4g08263 | pathogenesis-related protein PR-4                    | 14.72     | 718.47   | 550.88   | 1244.01      |
| EL10Ac9g20649 | tyrosine/DOPA decarboxylase 1                        | 8.01      | 616.73   | 96.31    | 511.71       |
| EL10Ac5g12050 | uncharacterized acetyltransferase At3g50280          | 9.84      | 514.73   | 74.23    | 438.68       |
| EL10Ac9g21173 | basic 7S globulin                                    | 4.97      | 301.84   | 88.11    | 198.21       |
| EL10Ac4g09723 | 4,5-DOPA dioxygenase extradiol                       | 2.89      | 230.43   | 47.74    | 295.29       |
| EL10As3g23352 | 2-hydroxyisoflavanone dehydratase                    | 6.20      | 220.86   | 59.05    | 265.30       |
| EL10Ac7g17571 | ethylene-responsive transcription factor ERF073      | 2.10      | 212.62   | 45.94    | 241.78       |
| EL10Ac6g15542 | peroxidase 27                                        | 0.51      | 206.15   | 14.44    | 105.50       |
| EL10Ac8g19057 | auxin-binding protein ABP19b                         | 0.19      | 165.58   | 10.12    | 131.31       |
| EL10Ac3g07123 | zeatin O-glucosyltransferase                         | 4.23      | 132.63   | 28.26    | 157.86       |
| EL10Ac9g21828 | unknown function                                     | 5.15      | 129.09   | 18.50    | 115.18       |
| EL10Ac8g18457 | hypothetical protein BVRB_1g000360                   | 0.14      | 127.41   | 21.53    | 65.84        |
| EL10Ac6g14807 | E3 ubiquitin-protein ligase ATL31                    | 2.42      | 118.77   | 31.29    | 171.74       |
| EL10Ac8g19059 | auxin-binding protein ABP19b                         | 0.12      | 118.39   | 11.24    | 118.62       |
| EL10Ac4g09811 | unknown function                                     | 1.98      | 100.72   | 16.59    | 72.94        |
| EL10Ac2g03442 | zinc finger protein ZAT12                            | 2.17      | 86.31    | 31.23    | 123.62       |
| EL10Ac4g09030 | probable glutathione S-transferase parC              | 0.00      | 81.46    | 26.19    | 71.48        |
| EL10Ac1g01145 | hypothetical protein                                 | 4.14      | 80.69    | 12.06    | 80.89        |
| EL10Ac9g22781 | EF hand domain containing protein                    | 1.46      | 80.54    | 44.69    | 85.91        |
| EL10Ac4g09467 | berberine bridge enzyme-like 8                       | 1.96      | 76.03    | 19.63    | 81.69        |
| EL10Ac5g12016 | probable aminotransferase TAT2                       | 0.07      | 74.03    | 15.75    | 52.57        |
| EL10Ac8g18390 | hypothetical protein BVRB_8g197390                   | 1.86      | 73.65    | 11.58    | 70.25        |
| EL10Ac4g08019 | FAD-dependent urate hydroxylase                      | 0.33      | 72.88    | 12.50    | 59.42        |
| EL10Ac5g11908 | ubiquinol oxidase 2, mitochondrial-like              | 0.65      | 72.17    | 15.53    | 102.16       |
| EL10Ac6g15677 | probable indole-3-acetic acid-amido synthetase GH3.1 | 0.28      | 67.91    | 11.34    | 59.32        |
| EL10Ac8g19060 | auxin-binding protein ABP19b                         | 0.04      | 65.17    | 6.07     | 73.88        |
| EL10Ac4g10349 | transmembrane protein 45B                            | 0.98      | 62.64    | 13.40    | 94.15        |
| EL10Ac8g19076 | auxin-binding protein ABP19b                         | 0.25      | 57.51    | 5.74     | 32.33        |
| EL10Ac9g21784 | allene oxide synthase                                | 3.63      | 53.89    | 10.42    | 86.45        |
| EL10Ac1g00584 | putative germin-like protein 2-1                     | 1.10      | 50.63    | 21.21    | 91.12        |
| EL10Ac6g14837 | anthocyanidin 3-O-glucosyltransferase 2              | 1.99      | 50.54    | 10.97    | 46.00        |
| EL10Ac6g13535 | probable WRKY transcription factor 13                | 0.00      | 48.75    | 12.30    | 0.00         |
| EL10Ac1g01083 | hypothetical protein                                 | 0.05      | 48.54    | 3.63     | 16.42        |
| EL10Ac9g22620 | benzyl alcohol O-benzoyltransferase                  | 0.42      | 48.34    | 5.15     | 39.14        |
| EL10Ac1g02328 | cytochrome P450 81E8                                 | 0.14      | 45.89    | 9.24     | 48.31        |
| EL10Ac5g11004 | glutathione S-transferase U9                         | 1.79      | 43.96    | 13.02    | 69.96        |
| EL10Ac7g15909 | UDP-glycosyltransferase 87A2                         | 2.13      | 43.56    | 11.83    | 41.63        |
| EL10Ac7g17719 | alcohol dehydrogenase class-3                        | 22.01     | 42.17    | 0.00     | 28.46        |
| EL10Ac9g22251 | probable indole-3-acetic acid-amido synthetase GH3.1 | 0.22      | 37.41    | 6.81     | 32.47        |
| EL10Ac5g10581 | UDP-glycosyltransferase 74F2                         | 0.52      | 37.25    | 6.21     | 53.16        |
| EL10Ac5g12393 | B3 domain-containing protein                         | 0.15      | 34.41    | 5.96     | 24.30        |
| EL10Ac7g16740 | Auxin-binding protein ABP19a                         | 0.04      | 32.46    | 1.51     | 35.59        |
| EL10Ac7g16199 | Mitogen-activated protein kinase A                   | 0.43      | 32.40    | 5.19     | 27.32        |
| EL10Ac1g01588 | ethylene-responsive transcription factor ABR1        | 0.24      | 31.84    | 5.50     | 21.70        |
| EL10Ac2g03379 | gibberellin-regulated protein 14                     | 137.48    | 6.24     | 31.34    | 3.57         |
| EL10Ac8g20056 | peroxidase 42                                        | 273.12    | 5.18     | 55.45    | 2.50         |

|               |                                       |        |      |       |      |
|---------------|---------------------------------------|--------|------|-------|------|
| EL10Ac7g16456 | dormancy-associated protein homolog 4 | 72.46  | 4.49 | 38.97 | 4.04 |
| EL10Ac1g00405 | aquaporin PIP1-2                      | 76.51  | 3.44 | 21.43 | 1.26 |
| EL10Ac2g04670 | probable lipid transfer               | 12.03  | 3.32 | 3.24  | 0.01 |
| EL10Ac4g08792 | hypothetical protein                  | 46.72  | 3.08 | 4.33  | 1.24 |
| EL10As5g23597 | galactinol synthase BvRafS1           | 76.57  | 2.99 | 15.54 | 6.93 |
| EL10Ac9g22046 | aquaporin TIP2-1                      | 103.65 | 1.33 | 16.63 | 1.08 |

---

**Table S3.** Differentially expressed (mean normalized FPKM value) representative *Rhizoctonia solani* (Rhi) genes with high expression in the roots at 2-day post inoculation (dpi) of sugar beet alone or in combination with *Leuconostoc mesenteroides* (Leu). Data are Mean of 4 biological replicates ( $p < 0.05$ ; mock vs. treatment).

| Gene_ID             | Description                                                           | FPKM Mock | FPKM Rhi | FPKM Rhi + Leu |
|---------------------|-----------------------------------------------------------------------|-----------|----------|----------------|
| RSOLAG2-2IIIB_03040 | PREDICTED: 40S ribosomal protein S28-B                                | 0         | 857.65   | 650.71         |
| RSOLAG2-2IIIB_06408 | elongation factor 1-beta                                              | 0         | 558.21   | 516.16         |
| RSOLAG2-2IIIB_05721 | hypothetical protein                                                  | 0         | 542.57   | 420.48         |
| RSOLAG2-2IIIB_04451 | D-arabinitol dehydrogenase 1                                          | 0         | 476.89   | 362.08         |
| RSOLAG2-2IIIB_02188 | ribosomal protein S25                                                 | 0         | 417.35   | 444.79         |
| RSOLAG2-2IIIB_01577 | peptidyl-Lys metalloendopeptidase                                     | 0         | 388.03   | 268.59         |
| RSOLAG2-2IIIB_00954 | hypothetical protein                                                  | 0         | 355.74   | 257.57         |
| RSOLAG2-2IIIB_02160 | 40S ribosomal protein S13                                             | 0         | 316.53   | 287.27         |
| RSOLAG2-2IIIB_03341 | deuterolysin M35 metalloprotease                                      | 0         | 314.37   | 251.86         |
| RSOLAG2-2IIIB_02528 | 40S ribosomal protein S16                                             | 0         | 302.32   | 285.81         |
| RSOLAG2-2IIIB_00651 | uracil permease                                                       | 0         | 290.13   | 196.73         |
| RSOLAG2-2IIIB_10173 | proteinase T-like                                                     | 0         | 289.13   | 258.68         |
| RSOLAG2-2IIIB_01551 | heat shock 70 kDa protein 2 isoform X3                                | 0         | 272.63   | 294.80         |
| RSOLAG2-2IIIB_04169 | guanine nucleotide-binding protein subunit beta-like protein          | 0         | 256.42   | 220.32         |
| RSOLAG2-2IIIB_02789 | 60S ribosomal protein L11                                             | 0         | 246.80   | 255.13         |
| RSOLAG2-2IIIB_01383 | 1,4-alpha-glucan-branching enzyme                                     | 0         | 231.44   | 185.75         |
| RSOLAG2-2IIIB_01895 | 40S ribosomal protein S10-A                                           | 0         | 199.05   | 185.24         |
| RSOLAG2-2IIIB_02293 | alkali-sensitive linkage protein 1                                    | 0         | 187.56   | 154.03         |
| RSOLAG2-2IIIB_02803 | cytochrome c1, heme protein, mitochondrial                            | 0         | 185.37   | 179.62         |
| RSOLAG2-2IIIB_06812 | probable metal-nicotianamine transporter YSL4                         | 0         | 174.82   | 114.59         |
| RSOLAG2-2IIIB_03931 | PREDICTED: UDP-glucuronic acid decarboxylase 1                        | 0         | 168.45   | 121.92         |
| RSOLAG2-2IIIB_05581 | 60S ribosomal protein L12                                             | 0         | 166.98   | 182.31         |
| RSOLAG2-2IIIB_10727 | proteinase T                                                          | 0         | 166.16   | 122.95         |
| RSOLAG2-2IIIB_01858 | copper amine oxidase 1                                                | 0         | 155.42   | 96.65          |
| RSOLAG2-2IIIB_02703 | polyubiquitin isoform X1                                              | 0         | 149.73   | 116.27         |
| RSOLAG2-2IIIB_02600 | D-galacturonate reductase                                             | 0         | 149.65   | 133.18         |
| RSOLAG2-2IIIB_08104 | polysaccharide lyase family 14 protein                                | 0         | 146.87   | 127.86         |
| RSOLAG2-2IIIB_07842 | probable peptide transporter ptr2                                     | 0         | 125.36   | 86.94          |
| RSOLAG2-2IIIB_00696 | 5-methyltetrahydropteroyltriglutamate--homocysteine methyltransferase | 0         | 117.05   | 100.01         |
| RSOLAG2-2IIIB_10920 | ATP synthase subunit 5, mitochondrial                                 | 0         | 116.89   | 124.88         |
| RSOLAG2-2IIIB_01371 | 40S ribosomal S3a-2                                                   | 0         | 115.05   | 99.06          |
| RSOLAG2-2IIIB_10729 | proteinase T                                                          | 0         | 113.55   | 92.14          |
| RSOLAG2-2IIIB_10437 | hypothetical protein                                                  | 0         | 113.36   | 109.83         |
| RSOLAG2-2IIIB_05110 | polysaccharide lyase family 14 protein                                | 0         | 110.07   | 75.85          |
| RSOLAG2-2IIIB_03354 | S-adenosylmethionine synthase                                         | 0         | 109.78   | 92.60          |
| RSOLAG2-2IIIB_11563 | alanine--glyoxylate aminotransferase 1                                | 0         | 106.83   | 76.28          |
| RSOLAG2-2IIIB_06299 | glycogen [starch] synthase                                            | 0         | 106.76   | 88.68          |
| RSOLAG2-2IIIB_00266 | ornithine aminotransferase                                            | 0         | 106.22   | 84.60          |
| RSOLAG2-2IIIB_03646 | prohibitin-2                                                          | 0         | 104.01   | 112.17         |
| RSOLAG2-2IIIB_05932 | putative sterigmatocystin biosynthesis protein stcT                   | 0         | 101.85   | 84.79          |

|                     |                                                   |   |        |        |
|---------------------|---------------------------------------------------|---|--------|--------|
| RSOLAG2-2IIIB_04036 | aspartate aminotransferase, mitochondrial         | 0 | 100.01 | 100.13 |
| RSOLAG2-2IIIB_04341 | citrate synthase, mitochondrial                   | 0 | 99.93  | 101.63 |
| RSOLAG2-2IIIB_01965 | 60S acidic ribosomal protein P0                   | 0 | 98.92  | 0.00   |
| RSOLAG2-2IIIB_02063 | thiamine pathway transporter THI73                | 0 | 97.32  | 71.41  |
| RSOLAG2-2IIIB_09088 | nitrite reductase [NAD(P)H]                       | 0 | 95.66  | 67.71  |
| RSOLAG2-2IIIB_06333 | septin homolog spn4                               | 0 | 89.00  | 68.97  |
| RSOLAG2-2IIIB_00596 | protein disulfide-isomerase                       | 0 | 83.16  | 68.02  |
| RSOLAG2-2IIIB_03614 | mitochondrial outer membrane protein porin        | 0 | 78.91  | 75.46  |
| RSOLAG2-2IIIB_02193 | 60S ribosomal protein L3                          | 0 | 74.10  | 56.56  |
| RSOLAG2-2IIIB_01145 | DEAD-box ATP-dependent RNA helicase 15 isoform X1 | 0 | 71.06  | 63.31  |
| RSOLAG2-2IIIB_00730 | meiotic sister chromatid recombination protein 1  | 0 | 69.47  | 48.73  |
| RSOLAG2-2IIIB_08266 | mitochondrial processing peptidase                | 0 | 69.27  | 80.86  |
| RSOLAG2-2IIIB_05835 | transmembrane GTPase fzo1                         | 0 | 69.14  | 66.16  |
| RSOLAG2-2IIIB_04292 | hydroxymethylglutaryl-CoA synthase                | 0 | 67.75  | 58.57  |
| RSOLAG2-2IIIB_09695 | hypothetical protein TanjilG_03100                | 0 | 66.09  | 71.33  |
| RSOLAG2-2IIIB_01496 | L-galactonate dehydratase                         | 0 | 65.68  | 55.07  |
| RSOLAG2-2IIIB_05058 | carboxypeptidase Y homolog A                      | 0 | 65.00  | 49.72  |
| RSOLAG2-2IIIB_00470 | fructose-1,6-bisphosphatase, cytosolic            | 0 | 62.20  | 74.85  |
| RSOLAG2-2IIIB_04062 | phosphoglucomutase                                | 0 | 60.31  | 53.13  |
| RSOLAG2-2IIIB_00164 | hypothetical protein                              | 0 | 58.93  | 62.18  |
| RSOLAG2-2IIIB_10184 | protein-glutamate O-methyltransferase C1393.13    | 0 | 52.03  | 52.25  |
| RSOLAG2-2IIIB_01353 | 5-aminolevulinate synthase, mitochondrial         | 0 | 51.86  | 62.62  |
| RSOLAG2-2IIIB_09494 | polysaccharide monooxygenase Cel61a               | 0 | 48.71  | 76.74  |
| RSOLAG2-2IIIB_05616 | putative protein C32A11,02c                       | 0 | 42.27  | 50.56  |

---

**Table S4.** Differentially expressed (mean normalized FPKM value) representative *Rhizoctonia solani* (Rhi) genes with high expression in the roots at 3-day post inoculation (dpi) of sugar beet alone or in combination with *Leuconostoc mesenteroides* (Leu). Data are Mean of 4 biological replicates ( $p < 0.05$ ; mock vs. treatment).

| Gene_ID             | Description                                                             | FPKM Mock | FPKM Rhi | FPKM Rhi + Leu |
|---------------------|-------------------------------------------------------------------------|-----------|----------|----------------|
| RSOLAG2-2IIIB_03040 | 40S ribosomal protein S28-B                                             | 0         | 790.05   | 984.05         |
| RSOLAG2-2IIIB_08570 | 40S ribosomal protein S12                                               | 0         | 585.18   | 548.73         |
| RSOLAG2-2IIIB_03281 | 60S ribosomal protein                                                   | 0         | 482.21   | 367.00         |
| RSOLAG2-2IIIB_01895 | 40S ribosomal protein S10-A                                             | 0         | 407.43   | 363.67         |
| RSOLAG2-2IIIB_07009 | 60S ribosomal protein L37a                                              | 0         | 406.65   | 498.76         |
| RSOLAG2-2IIIB_02160 | 40S ribosomal protein S13                                               | 0         | 387.96   | 399.76         |
| RSOLAG2-2IIIB_02803 | cytochrome c1, heme protein, mitochondrial                              | 0         | 372.68   | 340.36         |
| RSOLAG2-2IIIB_04169 | guanine nucleotide-binding protein subunit beta-like protein            | 0         | 361.58   | 384.15         |
| RSOLAG2-2IIIB_00227 | 40S ribosomal protein S23                                               | 0         | 360.07   | 338.87         |
| RSOLAG2-2IIIB_01648 | hypothetical protein                                                    | 0         | 340.07   | 225.35         |
| RSOLAG2-2IIIB_01383 | 1,4-alpha-glucan-branching enzyme                                       | 0         | 323.52   | 269.80         |
| RSOLAG2-2IIIB_12410 | predicted protein                                                       | 0         | 289.48   | 245.80         |
| RSOLAG2-2IIIB_01426 | 40S ribosomal S11                                                       | 0         | 254.86   | 247.07         |
| RSOLAG2-2IIIB_01011 | 60S ribosomal protein L26-1                                             | 0         | 244.09   | 230.07         |
| RSOLAG2-2IIIB_02789 | 60S ribosomal protein L11                                               | 0         | 239.91   | 268.88         |
| RSOLAG2-2IIIB_02600 | D-galacturonate reductase                                               | 0         | 239.67   | 179.43         |
| RSOLAG2-2IIIB_05426 | probable proline-specific permease put4                                 | 0         | 232.88   | 210.87         |
| RSOLAG2-2IIIB_00171 | 40S ribosomal protein S0                                                | 0         | 232.66   | 216.65         |
| RSOLAG2-2IIIB_04827 | 40S ribosomal protein S17-A                                             | 0         | 208.37   | 190.71         |
| RSOLAG2-2IIIB_11563 | alanine--glyoxylate aminotransferase 1                                  | 0         | 182.37   | 98.63          |
| RSOLAG2-2IIIB_10920 | ATP synthase subunit 5, mitochondrial                                   | 0         | 180.73   | 180.41         |
| RSOLAG2-2IIIB_04341 | citrate synthase, mitochondrial                                         | 0         | 170.31   | 207.04         |
| RSOLAG2-2IIIB_04521 | succinate dehydrogenase [ubiquinone] iron-sulfur subunit, mitochondrial | 0         | 157.77   | 132.74         |
| RSOLAG2-2IIIB_04442 | adenosylhomocysteinase                                                  | 0         | 156.80   | 111.10         |
| RSOLAG2-2IIIB_03354 | S-adenosylmethionine synthase                                           | 0         | 156.08   | 168.54         |
| RSOLAG2-2IIIB_00091 | cytochrome c peroxidase, mitochondrial                                  | 0         | 147.49   | 119.77         |
| RSOLAG2-2IIIB_00338 | 2-methylcitrate dehydratase                                             | 0         | 146.97   | 126.78         |
| RSOLAG2-2IIIB_01122 | hypothetical protein                                                    | 0         | 143.68   | 81.08          |
| RSOLAG2-2IIIB_03646 | prohibitin-2                                                            | 0         | 141.73   | 148.21         |
| RSOLAG2-2IIIB_02193 | 60S ribosomal protein L3                                                | 0         | 140.21   | 130.11         |
| RSOLAG2-2IIIB_03237 | isocitrate dehydrogenase [NAD] subunit 1, mitochondrial                 | 0         | 135.64   | 124.05         |
| RSOLAG2-2IIIB_00478 | ribonucleoside-diphosphate reductase small chain                        | 0         | 134.49   | 112.01         |
| RSOLAG2-2IIIB_00347 | hypothetical protein                                                    | 0         | 125.42   | 93.25          |
| RSOLAG2-2IIIB_01586 | putative 4-hydroxy-2-oxoglutarate aldolase, mitochondrial               | 0         | 122.80   | 67.51          |
| RSOLAG2-2IIIB_01940 | PREDICTED: ERBB-3 BINDING PROTEIN 1 isoform X2                          | 0         | 111.97   | 108.81         |
| RSOLAG2-2IIIB_03917 | isocitrate dehydrogenase [NAD] subunit 2, mitochondrial                 | 0         | 110.83   | 100.16         |
| RSOLAG2-2IIIB_01921 | hypothetical protein                                                    | 0         | 107.88   | 94.54          |
| RSOLAG2-2IIIB_05058 | carboxypeptidase Y homolog A                                            | 0         | 107.10   | 61.79          |
| RSOLAG2-2IIIB_05998 | mitochondrial arginine transporter BAC2                                 | 0         | 106.57   | 102.01         |
| RSOLAG2-2IIIB_00470 | fructose-1,6-bisphosphatase, cytosolic                                  | 0         | 105.76   | 85.41          |
| RSOLAG2-2IIIB_00587 | hypothetical protein                                                    | 0         | 101.15   | 72.33          |



|                     |                                                                |   |       |        |
|---------------------|----------------------------------------------------------------|---|-------|--------|
| RSOLAG2-2IIIB_01836 | phosphatidate cytidyltransferase, mitochondrial                | 0 | 99.81 | 87.73  |
| RSOLAG2-2IIIB_01145 | DEAD-box ATP-dependent RNA helicase 15 isoform X1              | 0 | 98.98 | 74.84  |
| RSOLAG2-2IIIB_07551 | adenosine kinase                                               | 0 | 96.93 | 92.89  |
| RSOLAG2-2IIIB_00740 | hypothetical protein                                           | 0 | 94.39 | 87.42  |
| RSOLAG2-2IIIB_08901 | ornithine decarboxylase                                        | 0 | 92.42 | 86.07  |
| RSOLAG2-2IIIB_10437 | hypothetical protein                                           | 0 | 91.44 | 88.90  |
| RSOLAG2-2IIIB_06941 | extracellular metalloproteinase                                | 0 | 91.31 | 44.95  |
| RSOLAG2-2IIIB_06059 | PREDICTED: putative UDP-sugar transporter DDB_G0278631         | 0 | 89.17 | 82.63  |
| RSOLAG2-2IIIB_02703 | polyubiquitin isoform X1                                       | 0 | 87.54 | 91.93  |
| RSOLAG2-2IIIB_00372 | heat shock protein hsp88                                       | 0 | 87.03 | 71.40  |
| RSOLAG2-2IIIB_01675 | hypothetical protein                                           | 0 | 83.11 | 63.34  |
| RSOLAG2-2IIIB_06924 | serine palmitoyltransferase 2                                  | 0 | 81.61 | 67.21  |
| RSOLAG2-2IIIB_01539 | polyadenylate-binding protein, cytoplasmic and nuclear         | 0 | 80.34 | 37.47  |
| RSOLAG2-2IIIB_08957 | 1,3-beta-glucan synthase component FKS1                        | 0 | 75.46 | 55.92  |
| RSOLAG2-2IIIB_01504 | glutamine--fructose-6-phosphate aminotransferase [isomerizing] | 0 | 74.36 | 58.72  |
| RSOLAG2-2IIIB_01939 | homocitrate synthase, mitochondrial                            | 0 | 70.90 | 103.33 |
| RSOLAG2-2IIIB_05421 | RNA-binding post-transcriptional regulator cip2                | 0 | 70.44 | 59.18  |
| RSOLAG2-2IIIB_00123 | putative mitochondrial chaperone BCS1-B                        | 0 | 70.21 | 53.06  |
| RSOLAG2-2IIIB_03937 | nucleoside diphosphate kinase                                  | 0 | 63.78 | 52.53  |
| RSOLAG2-2IIIB_03408 | exportin-1                                                     | 0 | 63.75 | 44.87  |
| RSOLAG2-2IIIB_07909 | V-type proton ATPase subunit B                                 | 0 | 63.50 | 53.90  |
| RSOLAG2-2IIIB_01118 | pyruvate decarboxylase                                         | 0 | 59.35 | 99.58  |

---

**Table S5.** Differentially expressed (mean normalized FPKM value) representative *Leuconostoc mesenteroides* (Leu) genes with high expression in the roots at 2-day post inoculation (dpi) of sugar beet alone or in combination with *Rhizoctonia solani* (Rhi). Data are Mean of 4 biological replicates ( $p < 0.01$ ; mock vs. treatment).

| Gene_ID      | Description                                                 | FPKM<br>Leu | FPKM<br>Rhi + Leu |
|--------------|-------------------------------------------------------------|-------------|-------------------|
| NH16_RS04570 | translation initiation factor IF-1                          | 2937.34     | 7921.85           |
| NH16_RS04590 | DNA-directed RNA polymerase subunit alpha                   | 2233.28     | 5548.51           |
| NH16_RS02995 | amino acid ABC transporter permease                         | 1474.35     | 2727.61           |
| NH16_RS02110 | DUF1440 domain-containing protein                           | 889.55      | 1634.84           |
| NH16_RS08760 | chorismate synthase                                         | 270.71      | 738.72            |
| NH16_RS05800 | UDP-N-acetylmuramoyl-tripeptide--D-alanyl-D- alanine ligase | 240.80      | 527.74            |
| NH16_RS07820 | BglG family transcription antiterminator                    | 174.48      | 20.57             |
| NH16_RS00290 | aldo/keto reductase                                         | 152.34      | 19.61             |
| NH16_RS04090 | FAD-dependent oxidoreductase                                | 134.73      | 156.76            |
| NH16_RS03055 | 23S rRNA (pseudouridine(1915)-N(3))-methyltransferase RlmH  | 29.97       | 26.73             |
| NH16_RS07315 | CCA tRNA nucleotidyltransferase                             | 24.45       | 11.70             |
| NH16_RS07865 | hydroxyethylthiazole kinase                                 | 13.69       | 0.00              |
| NH16_RS07350 | YozE family protein                                         | 13.49       | 0.00              |
| NH16_RS04800 | D-alanine--D-alanine ligase                                 | 0.00        | 75.73             |

**Table S6.** Differentially expressed (mean normalized FPKM value) representative *Leuconostoc mesenteroides* (Leu) genes in the roots with high expression at 3-day post inoculation (dpi) of sugar beet alone or in combination with *Rhizoctonia solani* (Rhi). Data are Mean of 4 biological replicates ( $p < 0.01$ ; mock vs. treatment).

| Gene ID      | Description                                           | FPKM<br>Leu | FPKM<br>Rhi + Leu |
|--------------|-------------------------------------------------------|-------------|-------------------|
| NH16_RS04635 | 50S ribosomal protein L13                             | 3773.66     | 5770.22           |
| NH16_RS04540 | 50S ribosomal protein L18                             | 2458.58     | 2860.44           |
| NH16_RS00880 | 50S ribosomal protein L20                             | 2000.43     | 2528.66           |
| NH16_RS02055 | response regulator transcription factor               | 1611.50     | 1400.55           |
| NH16_RS05935 | ABC transporter substrate-binding protein             | 1206.72     | 581.07            |
| NH16_RS02980 | ABC transporter permease                              | 1046.15     | 940.56            |
| NH16_RS08775 | shikimate dehydrogenase                               | 502.90      | 978.61            |
| NH16_RS03920 | ATP-binding cassette domain-containing protein        | 439.07      | 413.49            |
| NH16_RS01450 | histidinol-phosphate transaminase                     | 424.75      | 795.25            |
| NH16_RS06140 | GTPase ObgE                                           | 359.68      | 418.49            |
| NH16_RS00635 | mevalonate kinase                                     | 355.41      | 620.14            |
| NH16_RS04910 | ferrous iron transport protein B                      | 318.99      | 223.13            |
| NH16_RS05505 | excinuclease ABC subunit UvrA                         | 291.94      | 244.21            |
| NH16_RS01265 | primosomal protein N                                  | 224.63      | 188.66            |
| NH16_RS03610 | FAD-dependent oxidoreductase                          | 138.08      | 105.74            |
| NH16_RS02260 | aromatic acid exporter family protein                 | 108.81      | 100.65            |
| NH16_RS02915 | lactoylglutathione lyase                              | 105.73      | 102.54            |
| NH16_RS02510 | Mini-ribonuclease 3                                   | 76.02       | 122.39            |
| NH16_RS04190 | amino acid ABC transporter ATP-binding protein        | 70.31       | 33.88             |
| NH16_RS07305 | o-succinylbenzoate synthase                           | 57.41       | 87.07             |
| NH16_RS01270 | GNAT family N-acetyltransferase                       | 48.57       | 33.64             |
| NH16_RS07160 | amidophosphoribosyltransferase                        | 44.74       | 78.87             |
| NH16_RS07145 | phosphoribosylformylglycinamide synthase subunit PurS | 41.82       | 82.36             |
| NH16_RS04400 | serine--tRNA ligase                                   | 34.23       | 22.15             |
| NH16_RS06635 | ECF transporter S component                           | 33.62       | 24.01             |
| NH16_RS00970 | phosphoketolase                                       | 29.12       | 66.56             |
| NH16_RS01340 | GNAT family N-acetyltransferase                       | 28.65       | 17.06             |
| NH16_RS07715 | hypothetical protein                                  | 27.50       | 33.87             |
| NH16_RS05700 | DUF1275 domain-containing protein                     | 23.89       | 21.39             |
| NH16_RS01120 | hypothetical protein                                  | 20.66       | 18.16             |
| NH16_RS06285 | acetolactate decarboxylase                            | 13.48       | 9.82              |
| NH16_RS02500 | sigma-70 family RNA polymerase sigma factor           | 8.10        | 240.92            |
| NH16_RS08260 | citrate lyase acyl carrier protein                    | 5.71        | 33.46             |
| NH16_RS07280 | hypothetical protein                                  | 1.38        | 349.45            |

**Table S7.** Sugar beet RNAseq read details.

| Sample      | Raw Data |        | Valid Data |       | Valid Ratio (reads) | Q20%  | Q30%  | GC content% |
|-------------|----------|--------|------------|-------|---------------------|-------|-------|-------------|
|             | Read     | Base   | Read       | Base  |                     |       |       |             |
| d1_Leu1     | 65487672 | 9.82G  | 60064640   | 9.01G | 91.72               | 99.99 | 98.79 | 48          |
| d1_Leu2     | 62645882 | 9.40G  | 60058724   | 9.01G | 95.87               | 99.99 | 98.65 | 47          |
| d1_Leu3     | 67739008 | 10.16G | 62695848   | 9.40G | 92.56               | 99.99 | 98.77 | 47.50       |
| d1_Leu4     | 69125774 | 10.37G | 63245072   | 9.49G | 91.49               | 99.99 | 98.82 | 48          |
| d1_M1       | 63901668 | 9.59G  | 60226154   | 9.03G | 94.25               | 99.99 | 98.82 | 48          |
| d1_M2       | 65165976 | 9.77G  | 61274562   | 9.19G | 94.03               | 99.99 | 98.79 | 48          |
| d1_M3       | 69461552 | 10.42G | 65411518   | 9.81G | 94.17               | 99.99 | 98.82 | 48.50       |
| d1_M4       | 64456940 | 9.67G  | 60311376   | 9.05G | 93.57               | 99.99 | 98.86 | 48.50       |
| d1_Rhi1     | 68448048 | 10.27G | 63212404   | 9.48G | 92.35               | 99.99 | 98.81 | 48          |
| d1_Rhi2     | 68536942 | 10.28G | 65361098   | 9.80G | 95.37               | 99.99 | 98.64 | 47          |
| d1_Rhi3     | 66430266 | 9.96G  | 63280294   | 9.49G | 95.26               | 99.99 | 98.72 | 47.50       |
| d1_Rhi4     | 64294640 | 9.64G  | 60046890   | 9.01G | 93.39               | 99.99 | 98.87 | 48          |
| d1_Rhi_Leu1 | 67359690 | 10.10G | 63339428   | 9.50G | 94.03               | 99.99 | 98.70 | 47.50       |
| d1_Rhi_Leu2 | 64813718 | 9.72G  | 61368888   | 9.21G | 94.69               | 99.99 | 98.51 | 47          |
| d1_Rhi_Leu3 | 68536094 | 10.28G | 65091852   | 9.76G | 94.97               | 99.99 | 98.68 | 47.50       |
| d1_Rhi_Leu4 | 54656370 | 8.20G  | 52127104   | 7.82G | 95.37               | 99.99 | 98.89 | 47          |
| d2_Leu1     | 53075054 | 7.96G  | 48376236   | 7.26G | 91.15               | 99.99 | 98.87 | 48.50       |
| d2_Leu2     | 44465704 | 6.67G  | 37941492   | 5.69G | 85.33               | 99.99 | 98.88 | 47          |
| d2_Leu3     | 60519132 | 9.08G  | 55459260   | 8.32G | 91.64               | 99.99 | 98.88 | 48.50       |
| d2_Leu4     | 61772506 | 9.27G  | 55131028   | 8.27G | 89.25               | 99.99 | 98.85 | 47          |
| d2_M1       | 44341304 | 6.65G  | 41875280   | 6.28G | 94.44               | 99.99 | 98.84 | 48          |
| d2_M2       | 48503412 | 7.28G  | 45188244   | 6.78G | 93.17               | 99.99 | 98.85 | 48.50       |
| d2_M3       | 63920158 | 9.59G  | 60085890   | 9.01G | 94.00               | 99.99 | 98.87 | 49          |
| d2_M4       | 59143198 | 8.87G  | 55370898   | 8.31G | 93.62               | 99.99 | 98.92 | 49.50       |
| d2_Rhi1     | 55408084 | 8.31G  | 52154134   | 7.82G | 94.13               | 99.99 | 98.78 | 48          |
| d2_Rhi2     | 49712480 | 7.46G  | 47376110   | 7.11G | 95.30               | 99.99 | 98.64 | 48          |
| d2_Rhi3     | 51773938 | 7.77G  | 49823316   | 7.47G | 96.23               | 99.99 | 98.71 | 47          |
| d2_Rhi4     | 66055244 | 9.91G  | 59612038   | 8.94G | 90.25               | 99.99 | 98.90 | 47          |
| d2_Rhi_Leu1 | 61695938 | 9.25G  | 56658942   | 8.50G | 91.84               | 99.99 | 98.72 | 48          |
| d2_Rhi_Leu2 | 57304326 | 8.60G  | 51561444   | 7.73G | 89.98               | 99.99 | 98.67 | 48          |
| d2_Rhi_Leu3 | 59011124 | 8.85G  | 49066802   | 7.36G | 83.15               | 99.99 | 98.82 | 48          |
| d2_Rhi_Leu4 | 61023008 | 9.15G  | 58262790   | 8.74G | 95.48               | 99.99 | 98.74 | 48          |
| d3_Leu1     | 49083418 | 7.36G  | 47192444   | 7.08G | 96.15               | 99.99 | 98.68 | 47          |
| d3_Leu2     | 46993408 | 7.05G  | 45413038   | 6.81G | 96.64               | 99.99 | 98.66 | 47          |
| d3_Leu3     | 53948730 | 8.09G  | 51981732   | 7.80G | 96.35               | 99.99 | 98.66 | 47          |
| d3_Leu4     | 68769002 | 10.32G | 66169798   | 9.93G | 96.22               | 99.99 | 98.75 | 47          |
| d3_M1       | 45436988 | 6.82G  | 43011480   | 6.45G | 94.66               | 99.99 | 98.72 | 47.50       |
| d3_M2       | 53431094 | 8.01G  | 52010420   | 7.80G | 97.34               | 99.99 | 98.52 | 47          |
| d3_M3       | 51522922 | 7.73G  | 49713912   | 7.46G | 96.49               | 99.99 | 98.57 | 46          |
| d3_M4       | 57084918 | 8.56G  | 55049850   | 8.26G | 96.44               | 99.99 | 98.75 | 47          |
| d3_Rhi1     | 57132750 | 8.57G  | 55350464   | 8.30G | 96.88               | 99.99 | 98.53 | 47          |
| d3_Rhi2     | 57301378 | 8.60G  | 55627196   | 8.34G | 97.08               | 99.99 | 98.42 | 46          |
| d3_Rhi3     | 46337168 | 6.95G  | 45154378   | 6.77G | 97.45               | 99.99 | 98.52 | 46          |
| d3_Rhi4     | 50122596 | 7.52G  | 48955106   | 7.34G | 97.67               | 99.99 | 98.70 | 46          |
| d3_Rhi_Leu1 | 55783156 | 8.37G  | 53886714   | 8.08G | 96.60               | 99.99 | 98.63 | 48          |
| d3_Rhi_Leu2 | 57412382 | 8.61G  | 55667746   | 8.35G | 96.96               | 99.99 | 98.47 | 47          |
| d3_Rhi_Leu3 | 53120722 | 7.97G  | 49507284   | 7.43G | 93.20               | 99.99 | 98.69 | 47          |
| d3_Rhi_Leu4 | 54374988 | 8.16G  | 52805640   | 7.92G | 97.11               | 99.99 | 98.89 | 46          |

**Table S8. *Rhizoctonia solani* RNAseq read details.**

| Sample      | Raw Data |        | Valid Data |        | Valid Ratio(reads) | Q20%  | Q30%  | GC content% |
|-------------|----------|--------|------------|--------|--------------------|-------|-------|-------------|
|             | Read     | Base   | Read       | Base   |                    |       |       |             |
| d1_Leu1     | 64271026 | 9.64G  | 58948738   | 8.84G  | 91.72              | 99.99 | 98.79 | 48          |
| d1_Leu2     | 62645882 | 9.40G  | 60058724   | 9.01G  | 95.87              | 99.99 | 98.65 | 47          |
| d1_Leu3     | 69569854 | 10.44G | 64385608   | 9.66G  | 92.55              | 99.99 | 98.77 | 47.50       |
| d1_Leu4     | 66796924 | 10.02G | 61118316   | 9.17G  | 91.50              | 99.99 | 98.82 | 48          |
| d1_M1       | 64605246 | 9.69G  | 60887334   | 9.13G  | 94.25              | 99.99 | 98.82 | 48          |
| d1_M2       | 66425612 | 9.96G  | 62456846   | 9.37G  | 94.03              | 99.99 | 98.79 | 48          |
| d1_M3       | 67018674 | 10.05G | 63111876   | 9.47G  | 94.17              | 99.99 | 98.82 | 48.50       |
| d1_M4       | 69603366 | 10.44G | 65118684   | 9.77G  | 93.56              | 99.99 | 98.86 | 48.50       |
| d1_Rhi1     | 64571866 | 9.69G  | 59645378   | 8.95G  | 92.37              | 99.99 | 98.81 | 48          |
| d1_Rhi2     | 69975860 | 10.50G | 66730696   | 10.01G | 95.36              | 99.99 | 98.64 | 47          |
| d1_Rhi3     | 63610672 | 9.54G  | 60599716   | 9.09G  | 95.27              | 99.99 | 98.73 | 47.50       |
| d1_Rhi4     | 69064436 | 10.36G | 64497360   | 9.67G  | 93.39              | 99.99 | 98.87 | 48          |
| d1_Rhi_Leu1 | 65978810 | 9.90G  | 62043514   | 9.31G  | 94.04              | 99.99 | 98.70 | 47.50       |
| d1_Rhi_Leu2 | 68541860 | 10.28G | 64890528   | 9.73G  | 94.67              | 99.99 | 98.51 | 47          |
| d1_Rhi_Leu3 | 65055476 | 9.76G  | 61793902   | 9.27G  | 94.99              | 99.99 | 98.68 | 47.50       |
| d1_Rhi_Leu4 | 54656370 | 8.20G  | 52127104   | 7.82G  | 95.37              | 99.99 | 98.89 | 47          |
| d2_Leu1     | 53075054 | 7.96G  | 48376236   | 7.26G  | 91.15              | 99.99 | 98.87 | 48.50       |
| d2_Leu2     | 44465704 | 6.67G  | 37941492   | 5.69G  | 85.33              | 99.99 | 98.88 | 47          |
| d2_Leu3     | 60519132 | 9.08G  | 55459260   | 8.32G  | 91.64              | 99.99 | 98.88 | 48.50       |
| d2_Leu4     | 61772506 | 9.27G  | 55131028   | 8.27G  | 89.25              | 99.99 | 98.85 | 47          |
| d2_M1       | 44341304 | 6.65G  | 41875280   | 6.28G  | 94.44              | 99.99 | 98.84 | 48          |
| d2_M2       | 48503412 | 7.28G  | 45188244   | 6.78G  | 93.17              | 99.99 | 98.85 | 48.50       |
| d2_M3       | 69525488 | 10.43G | 65344604   | 9.80G  | 93.99              | 99.99 | 98.87 | 49          |
| d2_M4       | 59143198 | 8.87G  | 55370898   | 8.31G  | 93.62              | 99.99 | 98.92 | 49.50       |
| d2_Rhi1     | 55408084 | 8.31G  | 52154134   | 7.82G  | 94.13              | 99.99 | 98.78 | 48          |
| d2_Rhi2     | 49712480 | 7.46G  | 47376110   | 7.11G  | 95.30              | 99.99 | 98.64 | 48          |
| d2_Rhi3     | 51773938 | 7.77G  | 49823316   | 7.47G  | 96.23              | 99.99 | 98.71 | 47          |
| d2_Rhi4     | 63638294 | 9.55G  | 57437044   | 8.62G  | 90.26              | 99.99 | 98.90 | 47          |
| d2_Rhi_Leu1 | 61695938 | 9.25G  | 56658942   | 8.50G  | 91.84              | 99.99 | 98.72 | 48          |
| d2_Rhi_Leu2 | 57304326 | 8.60G  | 51561444   | 7.73G  | 89.98              | 99.99 | 98.67 | 48          |
| d2_Rhi_Leu3 | 59011124 | 8.85G  | 49066802   | 7.36G  | 83.15              | 99.99 | 98.82 | 48          |
| d2_Rhi_Leu4 | 61023008 | 9.15G  | 58262790   | 8.74G  | 95.48              | 99.99 | 98.74 | 48          |
| d3_Leu1     | 49083418 | 7.36G  | 47192444   | 7.08G  | 96.15              | 99.99 | 98.68 | 47          |
| d3_Leu2     | 46993408 | 7.05G  | 45413038   | 6.81G  | 96.64              | 99.99 | 98.66 | 47          |
| d3_Leu3     | 53948730 | 8.09G  | 51981732   | 7.80G  | 96.35              | 99.99 | 98.66 | 47          |
| d3_Leu4     | 66782970 | 10.02G | 64261478   | 9.64G  | 96.22              | 99.99 | 98.75 | 47          |
| d3_M1       | 45436988 | 6.82G  | 43011480   | 6.45G  | 94.66              | 99.99 | 98.72 | 47.50       |
| d3_M2       | 53431094 | 8.01G  | 52010420   | 7.80G  | 97.34              | 99.99 | 98.52 | 47          |
| d3_M3       | 51522922 | 7.73G  | 49713912   | 7.46G  | 96.49              | 99.99 | 98.57 | 46          |
| d3_M4       | 57084918 | 8.56G  | 55049850   | 8.26G  | 96.44              | 99.99 | 98.75 | 47          |
| d3_Rhi1     | 57132750 | 8.57G  | 55350464   | 8.30G  | 96.88              | 99.99 | 98.53 | 47          |
| d3_Rhi2     | 57301378 | 8.60G  | 55627196   | 8.34G  | 97.08              | 99.99 | 98.42 | 46          |
| d3_Rhi3     | 46337168 | 6.95G  | 45154378   | 6.77G  | 97.45              | 99.99 | 98.52 | 46          |
| d3_Rhi4     | 50122596 | 7.52G  | 48955106   | 7.34G  | 97.67              | 99.99 | 98.70 | 46          |
| d3_Rhi_Leu1 | 55783156 | 8.37G  | 53886714   | 8.08G  | 96.60              | 99.99 | 98.63 | 48          |
| d3_Rhi_Leu2 | 57412382 | 8.61G  | 55667746   | 8.35G  | 96.96              | 99.99 | 98.47 | 47          |
| d3_Rhi_Leu3 | 53120722 | 7.97G  | 49507284   | 7.43G  | 93.20              | 99.99 | 98.69 | 47          |
| d3_Rhi_Leu4 | 54374988 | 8.16G  | 52805640   | 7.92G  | 97.11              | 99.99 | 98.89 | 46          |

**Table S9.** *Leuconostoc mesenteroides* RNAseq read details.

| Sample      | Raw Data |        | Valid Data |       | Valid Ratio (reads) | Q20%  | Q30%  | GC content% |
|-------------|----------|--------|------------|-------|---------------------|-------|-------|-------------|
|             | Read     | Base   | Read       | Base  |                     |       |       |             |
| d1_Leu1     | 67942720 | 10.19G | 62309402   | 9.35G | 91.71               | 99.99 | 98.79 | 48          |
| d1_Leu2     | 62645882 | 9.40G  | 60058724   | 9.01G | 95.87               | 99.99 | 98.65 | 47          |
| d1_Leu3     | 66746314 | 10.01G | 61778412   | 9.27G | 92.56               | 99.99 | 98.77 | 47.50       |
| d1_Leu4     | 68447286 | 10.27G | 62626084   | 9.39G | 91.50               | 99.99 | 98.82 | 48          |
| d1_M1       | 64801402 | 9.72G  | 61071356   | 9.16G | 94.24               | 99.99 | 98.82 | 48          |
| d1_M2       | 66372462 | 9.96G  | 62406930   | 9.36G | 94.03               | 99.99 | 98.79 | 48          |
| d1_M3       | 65046252 | 9.76G  | 61258980   | 9.19G | 94.18               | 99.99 | 98.82 | 48.50       |
| d1_M4       | 63496436 | 9.52G  | 59413694   | 8.91G | 93.57               | 99.99 | 98.86 | 48.50       |
| d1_Rhi1     | 67333198 | 10.10G | 62185678   | 9.33G | 92.36               | 99.99 | 98.81 | 48          |
| d1_Rhi2     | 67503644 | 10.13G | 64377268   | 9.66G | 95.37               | 99.99 | 98.64 | 47          |
| d1_Rhi3     | 66430266 | 9.96G  | 63280294   | 9.49G | 95.26               | 99.99 | 98.72 | 47.50       |
| d1_Rhi4     | 66257120 | 9.94G  | 61877254   | 9.28G | 93.39               | 99.99 | 98.87 | 48          |
| d1_Rhi_Leu1 | 65227716 | 9.78G  | 61337848   | 9.20G | 94.04               | 99.99 | 98.70 | 47.50       |
| d1_Rhi_Leu2 | 68389360 | 10.26G | 64746438   | 9.71G | 94.67               | 99.99 | 98.51 | 47          |
| d1_Rhi_Leu3 | 66198624 | 9.93G  | 62877744   | 9.43G | 94.98               | 99.99 | 98.68 | 47.50       |
| d1_Rhi_Leu4 | 54656370 | 8.20G  | 52127104   | 7.82G | 95.37               | 99.99 | 98.89 | 47          |
| d2_Leu1     | 53075054 | 7.96G  | 48376236   | 7.26G | 91.15               | 99.99 | 98.87 | 48.50       |
| d2_Leu2     | 44465704 | 6.67G  | 37941492   | 5.69G | 85.33               | 99.99 | 98.88 | 47          |
| d2_Leu3     | 60519132 | 9.08G  | 55459260   | 8.32G | 91.64               | 99.99 | 98.88 | 48.50       |
| d2_Leu4     | 61772506 | 9.27G  | 55131028   | 8.27G | 89.25               | 99.99 | 98.85 | 47          |
| d2_M1       | 44341304 | 6.65G  | 41875280   | 6.28G | 94.44               | 99.99 | 98.84 | 48          |
| d2_M2       | 48503412 | 7.28G  | 45188244   | 6.78G | 93.17               | 99.99 | 98.85 | 48.50       |
| d2_M3       | 63664040 | 9.55G  | 59844910   | 8.98G | 94.00               | 99.99 | 98.87 | 49          |
| d2_M4       | 59143198 | 8.87G  | 55370898   | 8.31G | 93.62               | 99.99 | 98.92 | 49.50       |
| d2_Rhi1     | 55408084 | 8.31G  | 52154134   | 7.82G | 94.13               | 99.99 | 98.78 | 48          |
| d2_Rhi2     | 49712480 | 7.46G  | 47376110   | 7.11G | 95.30               | 99.99 | 98.64 | 48          |
| d2_Rhi3     | 51773938 | 7.77G  | 49823316   | 7.47G | 96.23               | 99.99 | 98.71 | 47          |
| d2_Rhi4     | 66517092 | 9.98G  | 60026678   | 9.00G | 90.24               | 99.99 | 98.90 | 47          |
| d2_Rhi_Leu1 | 61695938 | 9.25G  | 56658942   | 8.50G | 91.84               | 99.99 | 98.72 | 48          |
| d2_Rhi_Leu2 | 57304326 | 8.60G  | 51561444   | 7.73G | 89.98               | 99.99 | 98.67 | 48          |
| d2_Rhi_Leu3 | 59011124 | 8.85G  | 49066802   | 7.36G | 83.15               | 99.99 | 98.82 | 48          |
| d2_Rhi_Leu4 | 61023008 | 9.15G  | 58262790   | 8.74G | 95.48               | 99.99 | 98.74 | 48          |
| d3_Leu1     | 49083418 | 7.36G  | 47192444   | 7.08G | 96.15               | 99.99 | 98.68 | 47          |
| d3_Leu2     | 46993408 | 7.05G  | 45413038   | 6.81G | 96.64               | 99.99 | 98.66 | 47          |
| d3_Leu3     | 53948730 | 8.09G  | 51981732   | 7.80G | 96.35               | 99.99 | 98.66 | 47          |
| d3_Leu4     | 67088486 | 10.06G | 64554962   | 9.68G | 96.22               | 99.99 | 98.75 | 47          |
| d3_M1       | 45436988 | 6.82G  | 43011480   | 6.45G | 94.66               | 99.99 | 98.72 | 47.50       |
| d3_M2       | 53431094 | 8.01G  | 52010420   | 7.80G | 97.34               | 99.99 | 98.52 | 47          |
| d3_M3       | 51522922 | 7.73G  | 49713912   | 7.46G | 96.49               | 99.99 | 98.57 | 46          |
| d3_M4       | 57084918 | 8.56G  | 55049850   | 8.26G | 96.44               | 99.99 | 98.75 | 47          |
| d3_Rhi1     | 57132750 | 8.57G  | 55350464   | 8.30G | 96.88               | 99.99 | 98.53 | 47          |
| d3_Rhi2     | 57301378 | 8.60G  | 55627196   | 8.34G | 97.08               | 99.99 | 98.42 | 46          |
| d3_Rhi3     | 46337168 | 6.95G  | 45154378   | 6.77G | 97.45               | 99.99 | 98.52 | 46          |
| d3_Rhi4     | 50122596 | 7.52G  | 48955106   | 7.34G | 97.67               | 99.99 | 98.70 | 46          |
| d3_Rhi_Leu1 | 55783156 | 8.37G  | 53886714   | 8.08G | 96.60               | 99.99 | 98.63 | 48          |
| d3_Rhi_Leu2 | 57412382 | 8.61G  | 55667746   | 8.35G | 96.96               | 99.99 | 98.47 | 47          |
| d3_Rhi_Leu3 | 53120722 | 7.97G  | 49507284   | 7.43G | 93.20               | 99.99 | 98.69 | 47          |
| d3_Rhi_Leu4 | 54374988 | 8.16G  | 52805640   | 7.92G | 97.11               | 99.99 | 98.89 | 46          |
